# Supplementary material for: Chitosan Versus Dapagliflozin in a Diabetic Cardiomyopathy Mouse Model
Source: MDPI journal article supplement (doi:10.3390/ijms25042118), 2024-02-09
Supplement: s1 [file s1]

# Supplementary Materials

Table S1. Plasma glucose level (mean and SD).

| Weeks | Control |       | T1DM   |       | T1DM+Chitosan |       | T1DM+Dapagliflozin |       |
|-------|---------|-------|--------|-------|---------------|-------|--------------------|-------|
|       | Mean    | SD    | Mean   | SD    | Mean          | SD    | Mean               | SD    |
| 8     | 105,38  | 16,69 | 107,75 | 25,56 | 113,38        | 17,53 | 111,88             | 16,17 |
| 11    | 125,00  | 28,54 | 548,00 | 39,26 | 483,88        | 81,17 | 417,25             | 61,21 |
| 14    | 121,75  | 36,38 | 546,25 | 51,14 | 529,50        | 47,66 | 437,75             | 79,81 |
| 17    | 119,50  | 35,80 | 556,88 | 45,24 | 568,50        | 28,87 | 421,25             | 68,76 |
| 20    | 120,63  | 27,62 | 574,50 | 30,56 | 537,88        | 38,31 | 426,00             | 49,34 |

Table S2. ANOVA test results on plasma glucose levels.

| Tukey's multiple comparisons test    | Adjusted P Value | Summary |
|--------------------------------------|------------------|---------|
| <b>Week 8 (before STZ)</b>           |                  |         |
| Control vs. T1DM                     | 0,9828           | ns      |
| Control vs. T1DM+Chitosan            | 0,7481           | ns      |
| Control vs. T1DM+Dapagliflozin       | 0,8477           | ns      |
| T1DM vs. T1DM+Chitosan               | 0,9417           | ns      |
| T1DM vs. T1DM+Dapagliflozin          | 0,9751           | ns      |
| T1DM+Chitosan vs. T1DM+Dapagliflozin | 0,7545           | ns      |
| <b>Week 11 (after STZ)</b>           |                  |         |
| Control vs. T1DM                     | <0,0001          | ****    |
| Control vs. T1DM+Chitosan            | <0,0001          | ****    |
| Control vs. T1DM+Dapagliflozin       | <0,0001          | ****    |
| T1DM vs. T1DM+Chitosan               | 0,2952           | ns      |
| T1DM vs. T1DM+Dapagliflozin          | 0,0207           | *       |
| T1DM+Chitosan vs. T1DM+Dapagliflozin | 0,4055           | ns      |
| <b>Week 14 (after STZ)</b>           |                  |         |
| Control vs. T1DM                     | <0,0001          | ****    |
| Control vs. T1DM+Chitosan            | <0,0001          | ****    |
| Control vs. T1DM+Dapagliflozin       | <0,0001          | ****    |
| T1DM vs. T1DM+Chitosan               | 0,9187           | ns      |
| T1DM vs. T1DM+Dapagliflozin          | 0,1009           | ns      |
| T1DM+Chitosan vs. T1DM+Dapagliflozin | 0,1749           | ns      |
| <b>Week 17 (after STZ)</b>           |                  |         |
| Control vs. T1DM                     | <0,0001          | ****    |
| Control vs. T1DM+Chitosan            | <0,0001          | ****    |
| Control vs. T1DM+Dapagliflozin       | <0,0001          | ****    |
| T1DM vs. T1DM+Chitosan               | 0,905            | ns      |
| T1DM vs. T1DM+Dapagliflozin          | 0,0162           | *       |
| T1DM+Chitosan vs. T1DM+Dapagliflozin | 0,0045           | **      |
| <b>Week 20 (after STZ)</b>           |                  |         |
| Control vs. T1DM                     | <0,0001          | ****    |
| Control vs. T1DM+Chitosan            | <0,0001          | ****    |
| Control vs. T1DM+Dapagliflozin       | <0,0001          | ****    |
| T1DM vs. T1DM+Chitosan               | 0,3322           | ns      |
| T1DM vs. T1DM+Dapagliflozin          | 0,0015           | **      |
| T1DM+Chitosan vs. T1DM+Dapagliflozin | 0,0001           | ***     |

Table S3. Weight of study animals at enrollment.

|                | Control | T1DM  | T1DM+Chitosan | T1DM+Dapagliflozin |
|----------------|---------|-------|---------------|--------------------|
| Minimum        | 22,90   | 23,30 | 23,90         | 23,10              |
| 25% Percentile | 25,33   | 24,30 | 24,83         | 24,25              |
| Median         | 26,10   | 26,40 | 26,50         | 25,40              |
| 75% Percentile | 26,88   | 27,70 | 27,73         | 26,68              |
| Maximum        | 27,50   | 28,20 | 28,10         | 27,50              |
| Mean           | 25,90   | 26,09 | 26,33         | 25,41              |
| Std. Deviation | 1,41    | 1,86  | 1,53          | 1,49               |

Table S4. ANOVA test results on total cholesterol (TC) concentration after treatment for 12 weeks.

| Tukey's multiple comparisons test    | Adjusted P Value | Summary |
|--------------------------------------|------------------|---------|
| Control vs. T1DM                     | 0,6045           | ns      |
| Control vs. T1DM+Chitosan            | <0,0001          | ****    |
| Control vs. T1DM+Dapagliflozin       | 0,9913           | ns      |
| T1DM vs. T1DM+Chitosan               | <0,0001          | ****    |
| T1DM vs. T1DM+Dapagliflozin          | 0,776            | ns      |
| T1DM+Chitosan vs. T1DM+Dapagliflozin | <0,0001          | ****    |

Table S5. ANOVA test results on triglycerides concentration after treatment for 12 weeks.

| Tukey's multiple comparisons test    | Adjusted P Value | Summary |
|--------------------------------------|------------------|---------|
| Control vs. T1DM                     | <0,0001          | ****    |
| Control vs. T1DM+Chitosan            | 0,0082           | **      |
| Control vs. T1DM+Dapagliflozin       | 0,0006           | ***     |
| T1DM vs. T1DM+Chitosan               | <0,0001          | ****    |
| T1DM vs. T1DM+Dapagliflozin          | 0,1143           | ns      |
| T1DM+Chitosan vs. T1DM+Dapagliflozin | <0,0001          | ****    |

Table S6. ANOVA test results on left ventricular ejection fraction (LVEF).

| Tukey's multiple comparisons test    | Adjusted P Value | Summary |
|--------------------------------------|------------------|---------|
| Row 2                                |                  |         |
| Control vs. T1DM                     | 0,9281           | ns      |
| Control vs. T1DM+Chitosan            | 0,4072           | ns      |
| Control vs. T1DM+Dapagliflozin       | 0,8174           | ns      |
| T1DM vs. T1DM+Chitosan               | 0,7506           | ns      |
| T1DM vs. T1DM+Dapagliflozin          | 0,9912           | ns      |
| T1DM+Chitosan vs. T1DM+Dapagliflozin | 0,9078           | ns      |
| Row 3                                |                  |         |
| Control vs. T1DM                     | 0,0666           | ns      |
| Control vs. T1DM+Chitosan            | 0,3512           | ns      |
| Control vs. T1DM+Dapagliflozin       | 0,2175           | ns      |
| T1DM vs. T1DM+Chitosan               | 0,4158           | ns      |
| T1DM vs. T1DM+Dapagliflozin          | 0,8664           | ns      |
| T1DM+Chitosan vs. T1DM+Dapagliflozin | 0,8768           | ns      |
| Row 4                                |                  |         |
| Control vs. T1DM                     | 0,0026           | **      |
| Control vs. T1DM+Chitosan            | 0,0298           | *       |
| Control vs. T1DM+Dapagliflozin       | 0,3789           | ns      |
| T1DM vs. T1DM+Chitosan               | 0,1218           | ns      |
| T1DM vs. T1DM+Dapagliflozin          | 0,081            | ns      |
| T1DM+Chitosan vs. T1DM+Dapagliflozin | 0,8522           | ns      |
| Row 5                                |                  |         |
| Control vs. T1DM                     | <0,0001          | ****    |
| Control vs. T1DM+Chitosan            | 0,0002           | ***     |
| Control vs. T1DM+Dapagliflozin       | 0,0005           | ***     |
| T1DM vs. T1DM+Chitosan               | 0,0323           | *       |
| T1DM vs. T1DM+Dapagliflozin          | 0,0023           | **      |
| T1DM+Chitosan vs. T1DM+Dapagliflozin | 0,5285           | ns      |

Table S7. ANOVA test results on fractional shortening (FS).

| Tukey's multiple comparisons t | Adjusted P Value | Summary |
|--------------------------------|------------------|---------|
| Row 2                          |                  |         |
| Control vs. T1DM               | 0,7629           | ns      |
| Control vs. T1DM+Chitosan      | 0,9998           | ns      |
| Control vs. T1DM+Dapagliflozin | 0,7021           | ns      |
| T1DM vs. T1DM+Chitosan         | 0,8916           | ns      |
| T1DM vs. T1DM+Dapagliflozin    | 0,9977           | ns      |
| T1DM+Chitosan vs. T1DM+Da      | 0,8553           | ns      |
| Row 3                          |                  |         |
| Control vs. T1DM               | 0,4114           | ns      |
| Control vs. T1DM+Chitosan      | 0,959            | ns      |
| Control vs. T1DM+Dapagliflozin | 0,1762           | ns      |
| T1DM vs. T1DM+Chitosan         | 0,5238           | ns      |
| T1DM vs. T1DM+Dapagliflozin    | 0,77             | ns      |
| T1DM+Chitosan vs. T1DM+Da      | 0,214            | ns      |
| Row 4                          |                  |         |
| Control vs. T1DM               | 0,022            | *       |
| Control vs. T1DM+Chitosan      | 0,0565           | ns      |
| Control vs. T1DM+Dapagliflozin | 0,1723           | ns      |
| T1DM vs. T1DM+Chitosan         | 0,9754           | ns      |
| T1DM vs. T1DM+Dapagliflozin    | 0,842            | ns      |
| T1DM+Chitosan vs. T1DM+Da      | 0,9721           | ns      |
| Row 5                          |                  |         |
| Control vs. T1DM               | <0,0001          | ****    |
| Control vs. T1DM+Chitosan      | 0,0014           | **      |
| Control vs. T1DM+Dapagliflozin | 0,0014           | **      |
| T1DM vs. T1DM+Chitosan         | 0,0331           | *       |
| T1DM vs. T1DM+Dapagliflozin    | 0,1109           | ns      |
| T1DM+Chitosan vs. T1DM+Da      | 0,9959           | ns      |

Table S8. ANOVA test results on left ventricle (LV) end-diastolic volume (LVEDV).

| Tukey's multiple comparisons test    | Adjusted P Value | Summary |
|--------------------------------------|------------------|---------|
| Row 2                                |                  |         |
| Control vs. T1DM                     | 0,9993           | ns      |
| Control vs. T1DM+Chitosan            | 0,9852           | ns      |
| Control vs. T1DM+Dapagliflozin       | 0,8388           | ns      |
| T1DM vs. T1DM+Chitosan               | 0,9677           | ns      |
| T1DM vs. T1DM+Dapagliflozin          | 0,7623           | ns      |
| T1DM+Chitosan vs. T1DM+Dapagliflozin | 0,9838           | ns      |
| Row 3                                |                  |         |
| Control vs. T1DM                     | 0,9757           | ns      |
| Control vs. T1DM+Chitosan            | 0,9824           | ns      |
| Control vs. T1DM+Dapagliflozin       | 0,6416           | ns      |
| T1DM vs. T1DM+Chitosan               | >0,9999          | ns      |
| T1DM vs. T1DM+Dapagliflozin          | 0,8692           | ns      |
| T1DM+Chitosan vs. T1DM+Dapagliflozin | 0,9383           | ns      |
| Row 4                                |                  |         |
| Control vs. T1DM                     | 0,7873           | ns      |
| Control vs. T1DM+Chitosan            | 0,8183           | ns      |
| Control vs. T1DM+Dapagliflozin       | 0,5001           | ns      |
| T1DM vs. T1DM+Chitosan               | 0,998            | ns      |
| T1DM vs. T1DM+Dapagliflozin          | 0,9365           | ns      |
| T1DM+Chitosan vs. T1DM+Dapagliflozin | 0,9911           | ns      |
| Row 5                                |                  |         |
| Control vs. T1DM                     | 0,1871           | ns      |
| Control vs. T1DM+Chitosan            | 0,2371           | ns      |
| Control vs. T1DM+Dapagliflozin       | 0,1232           | ns      |
| T1DM vs. T1DM+Chitosan               | 0,9961           | ns      |
| T1DM vs. T1DM+Dapagliflozin          | 0,9516           | ns      |
| T1DM+Chitosan vs. T1DM+Dapagliflozin | 0,9941           | ns      |

Table S9. ANOVA test results on LV end-systolic volume (LVESV).

| Tukey's multiple comparisons test    | Adjusted P Value | Summary |
|--------------------------------------|------------------|---------|
| Row 2                                |                  |         |
| Control vs. T1DM                     | 0,9047           | ns      |
| Control vs. T1DM+Chitosan            | 0,7612           | ns      |
| Control vs. T1DM+Dapagliflozin       | 0,9875           | ns      |
| T1DM vs. T1DM+Chitosan               | 0,9746           | ns      |
| T1DM vs. T1DM+Dapagliflozin          | 0,995            | ns      |
| T1DM+Chitosan vs. T1DM+Dapagliflozin | 0,9361           | ns      |
| Row 3                                |                  |         |
| Control vs. T1DM                     | 0,2282           | ns      |
| Control vs. T1DM+Chitosan            | 0,8739           | ns      |
| Control vs. T1DM+Dapagliflozin       | 0,8756           | ns      |
| T1DM vs. T1DM+Chitosan               | 0,7956           | ns      |
| T1DM vs. T1DM+Dapagliflozin          | 0,7827           | ns      |
| T1DM+Chitosan vs. T1DM+Dapagliflozin | >0,9999          | ns      |
| Row 4                                |                  |         |
| Control vs. T1DM                     | 0,0545           | ns      |
| Control vs. T1DM+Chitosan            | 0,7763           | ns      |
| Control vs. T1DM+Dapagliflozin       | 0,9895           | ns      |
| T1DM vs. T1DM+Chitosan               | 0,5118           | ns      |
| T1DM vs. T1DM+Dapagliflozin          | 0,1875           | ns      |
| T1DM+Chitosan vs. T1DM+Dapagliflozin | 0,9333           | ns      |
| Row 5                                |                  |         |
| Control vs. T1DM                     | <0,0001          | ****    |
| Control vs. T1DM+Chitosan            | 0,048            | *       |
| Control vs. T1DM+Dapagliflozin       | 0,23             | ns      |
| T1DM vs. T1DM+Chitosan               | 0,062            | ns      |
| T1DM vs. T1DM+Dapagliflozin          | 0,0026           | **      |
| T1DM+Chitosan vs. T1DM+Dapagliflozin | 0,6556           | ns      |

Table S10. ANOVA test results on LV internal diastolic diameter (LVIDd).

| Tukey's multiple comparisons test    | Adjusted P Value | Summary |
|--------------------------------------|------------------|---------|
| Row 2                                |                  |         |
| Control vs. T1DM                     | 0,3962           | ns      |
| Control vs. T1DM+Chitosan            | 0,3036           | ns      |
| Control vs. T1DM+Dapagliflozin       | 0,7593           | ns      |
| T1DM vs. T1DM+Chitosan               | 0,9674           | ns      |
| T1DM vs. T1DM+Dapagliflozin          | 0,9449           | ns      |
| T1DM+Chitosan vs. T1DM+Dapagliflozin | 0,7958           | ns      |
| Row 3                                |                  |         |
| Control vs. T1DM                     | 0,2315           | ns      |
| Control vs. T1DM+Chitosan            | 0,2119           | ns      |
| Control vs. T1DM+Dapagliflozin       | 0,8647           | ns      |
| T1DM vs. T1DM+Chitosan               | 0,9434           | ns      |
| T1DM vs. T1DM+Dapagliflozin          | 0,6602           | ns      |
| T1DM+Chitosan vs. T1DM+Dapagliflozin | 0,5007           | ns      |
| Row 4                                |                  |         |
| Control vs. T1DM                     | 0,4623           | ns      |
| Control vs. T1DM+Chitosan            | 0,4492           | ns      |
| Control vs. T1DM+Dapagliflozin       | 0,9135           | ns      |
| T1DM vs. T1DM+Chitosan               | 0,9802           | ns      |
| T1DM vs. T1DM+Dapagliflozin          | 0,8182           | ns      |
| T1DM+Chitosan vs. T1DM+Dapagliflozin | 0,7344           | ns      |
| Row 5                                |                  |         |
| Control vs. T1DM                     | 0,9979           | ns      |
| Control vs. T1DM+Chitosan            | 0,814            | ns      |
| Control vs. T1DM+Dapagliflozin       | 0,9859           | ns      |
| T1DM vs. T1DM+Chitosan               | 0,7373           | ns      |
| T1DM vs. T1DM+Dapagliflozin          | 0,9982           | ns      |
| T1DM+Chitosan vs. T1DM+Dapagliflozin | 0,6684           | ns      |

Table S11. ANOVA test results on LV internal systolic diameter (LVISd).

| Tukey's multiple comparisons test    | Adjusted P Value | Summary |
|--------------------------------------|------------------|---------|
| Row 2                                |                  |         |
| Control vs. T1DM                     | 0,3102           | ns      |
| Control vs. T1DM+Chitosan            | 0,5183           | ns      |
| Control vs. T1DM+Dapagliflozin       | 0,6327           | ns      |
| T1DM vs. T1DM+Chitosan               | 0,9995           | ns      |
| T1DM vs. T1DM+Dapagliflozin          | 0,9835           | ns      |
| T1DM+Chitosan vs. T1DM+Dapagliflozin | 0,9814           | ns      |
| Row 3                                |                  |         |
| Control vs. T1DM                     | 0,1432           | ns      |
| Control vs. T1DM+Chitosan            | 0,168            | ns      |
| Control vs. T1DM+Dapagliflozin       | 0,428            | ns      |
| T1DM vs. T1DM+Chitosan               | >0,9999          | ns      |
| T1DM vs. T1DM+Dapagliflozin          | 0,9441           | ns      |
| T1DM+Chitosan vs. T1DM+Dapagliflozin | 0,9567           | ns      |
| Row 4                                |                  |         |
| Control vs. T1DM                     | 0,0443           | *       |
| Control vs. T1DM+Chitosan            | 0,0747           | ns      |
| Control vs. T1DM+Dapagliflozin       | 0,4306           | ns      |
| T1DM vs. T1DM+Chitosan               | 0,9966           | ns      |
| T1DM vs. T1DM+Dapagliflozin          | 0,7636           | ns      |
| T1DM+Chitosan vs. T1DM+Dapagliflozin | 0,7293           | ns      |
| Row 5                                |                  |         |
| Control vs. T1DM                     | 0,0793           | ns      |
| Control vs. T1DM+Chitosan            | 0,1031           | ns      |
| Control vs. T1DM+Dapagliflozin       | 0,4633           | ns      |
| T1DM vs. T1DM+Chitosan               | 0,9917           | ns      |
| T1DM vs. T1DM+Dapagliflozin          | 0,8047           | ns      |
| T1DM+Chitosan vs. T1DM+Dapagliflozin | 0,729            | ns      |



Table S12. ANOVA test results on interventricular septal width during end-diastole (IVSd).

|                                      |         |      |
|--------------------------------------|---------|------|
| Row 2                                |         |      |
| Control vs. T1DM                     | 0,6323  | ns   |
| Control vs. T1DM+Chitosan            | 0,9988  | ns   |
| Control vs. T1DM+Dapagliflozin       | 0,9993  | ns   |
| T1DM vs. T1DM+Chitosan               | 0,7601  | ns   |
| T1DM vs. T1DM+Dapagliflozin          | 0,6809  | ns   |
| T1DM+Chitosan vs. T1DM+Dapagliflozin | >0,9999 | ns   |
| Row 3                                |         |      |
| Control vs. T1DM                     | 0,7655  | ns   |
| Control vs. T1DM+Chitosan            | 0,6671  | ns   |
| Control vs. T1DM+Dapagliflozin       | >0,9999 | ns   |
| T1DM vs. T1DM+Chitosan               | 0,9903  | ns   |
| T1DM vs. T1DM+Dapagliflozin          | 0,735   | ns   |
| T1DM+Chitosan vs. T1DM+Dapagliflozin | 0,6346  | ns   |
| Row 4                                |         |      |
| Control vs. T1DM                     | 0,0161  | *    |
| Control vs. T1DM+Chitosan            | 0,3116  | ns   |
| Control vs. T1DM+Dapagliflozin       | 0,9857  | ns   |
| T1DM vs. T1DM+Chitosan               | 0,2095  | ns   |
| T1DM vs. T1DM+Dapagliflozin          | 0,0099  | **   |
| T1DM+Chitosan vs. T1DM+Dapagliflozin | 0,194   | ns   |
| Row 5                                |         |      |
| Control vs. T1DM                     | <0,0001 | **** |
| Control vs. T1DM+Chitosan            | <0,0001 | **** |
| Control vs. T1DM+Dapagliflozin       | 0,0865  | ns   |
| T1DM vs. T1DM+Chitosan               | 0,1395  | ns   |
| T1DM vs. T1DM+Dapagliflozin          | 0,0119  | *    |
| T1DM+Chitosan vs. T1DM+Dapagliflozin | 0,2331  | ns   |

Table S13. ANOVA test results on LV posterior wall width during end-diastole (LVPWd).

| Tukey's multiple comparisons test | Adjusted P Value | Summary |
|-----------------------------------|------------------|---------|
| Row 2                             |                  |         |
| Control vs. T1DM                  | 0,9038           | ns      |
| Control vs. T1DM+Chitosan         | 0,9995           | ns      |
| Control vs. T1DM+Dapagliflozin    | >0,9999          | ns      |
| T1DM vs. T1DM+Chitosan            | 0,9571           | ns      |
| T1DM vs. T1DM+Dapagliflozin       | 0,9006           | ns      |
| T1DM+Chitosan vs. T1DM+Dapaglifl  | 0,9998           | ns      |
| Row 3                             |                  |         |
| Control vs. T1DM                  | 0,9438           | ns      |
| Control vs. T1DM+Chitosan         | 0,9955           | ns      |
| Control vs. T1DM+Dapagliflozin    | 0,996            | ns      |
| T1DM vs. T1DM+Chitosan            | 0,9755           | ns      |
| T1DM vs. T1DM+Dapagliflozin       | 0,9792           | ns      |
| T1DM+Chitosan vs. T1DM+Dapaglifl  | >0,9999          | ns      |
| Row 4                             |                  |         |
| Control vs. T1DM                  | 0,0565           | ns      |
| Control vs. T1DM+Chitosan         | 0,502            | ns      |
| Control vs. T1DM+Dapagliflozin    | 0,9984           | ns      |
| T1DM vs. T1DM+Chitosan            | 0,289            | ns      |
| T1DM vs. T1DM+Dapagliflozin       | 0,037            | *       |
| T1DM+Chitosan vs. T1DM+Dapaglifl  | 0,3338           | ns      |
| Row 5                             |                  |         |
| Control vs. T1DM                  | <0,0001          | ****    |
| Control vs. T1DM+Chitosan         | 0,008            | **      |
| Control vs. T1DM+Dapagliflozin    | 0,0723           | ns      |
| T1DM vs. T1DM+Chitosan            | 0,0539           | ns      |
| T1DM vs. T1DM+Dapagliflozin       | 0,0135           | *       |
| T1DM+Chitosan vs. T1DM+Dapaglifl  | 0,8244           | ns      |

Table S14. ANOVA test results on E wave (early diastole).

| Tukey's multiple comparisons test    | Adjusted P Value | Summary |
|--------------------------------------|------------------|---------|
| Row 2                                |                  |         |
| Control vs. T1DM                     | 0,9967           | ns      |
| Control vs. T1DM+Chitosan            | 0,9138           | ns      |
| Control vs. T1DM+Dapagliflozin       | 0,6687           | ns      |
| T1DM vs. T1DM+Chitosan               | 0,9587           | ns      |
| T1DM vs. T1DM+Dapagliflozin          | 0,7009           | ns      |
| T1DM+Chitosan vs. T1DM+Dapagliflozin | 0,8499           | ns      |
| Row 3                                |                  |         |
| Control vs. T1DM                     | 0,4558           | ns      |
| Control vs. T1DM+Chitosan            | 0,4273           | ns      |
| Control vs. T1DM+Dapagliflozin       | 0,1345           | ns      |
| T1DM vs. T1DM+Chitosan               | >0,9999          | ns      |
| T1DM vs. T1DM+Dapagliflozin          | 0,6379           | ns      |
| T1DM+Chitosan vs. T1DM+Dapagliflozin | 0,6352           | ns      |
| Row 4                                |                  |         |
| Control vs. T1DM                     | 0,0601           | ns      |
| Control vs. T1DM+Chitosan            | 0,1007           | ns      |
| Control vs. T1DM+Dapagliflozin       | 0,0678           | ns      |
| T1DM vs. T1DM+Chitosan               | 0,9688           | ns      |
| T1DM vs. T1DM+Dapagliflozin          | 0,9962           | ns      |
| T1DM+Chitosan vs. T1DM+Dapagliflozin | 0,9907           | ns      |
| Row 5                                |                  |         |
| Control vs. T1DM                     | <0,0001          | ****    |
| Control vs. T1DM+Chitosan            | 0,0001           | ***     |
| Control vs. T1DM+Dapagliflozin       | 0,0019           | **      |
| T1DM vs. T1DM+Chitosan               | 0,002            | **      |
| T1DM vs. T1DM+Dapagliflozin          | <0,0001          | ****    |
| T1DM+Chitosan vs. T1DM+Dapagliflozin | 0,0568           | ns      |

Table S15. ANOVA test results on A wave (atrial systole).

| Tukey's multiple comparisons test | Adjusted P Value | Summary |
|-----------------------------------|------------------|---------|
| Row 2                             |                  |         |
| Control vs. T1DM                  | 0,9994           | ns      |
| Control vs. T1DM+Chitosan         | 0,9784           | ns      |
| Control vs. T1DM+Dapagliflozin    | 0,922            | ns      |
| T1DM vs. T1DM+Chitosan            | 0,9802           | ns      |
| T1DM vs. T1DM+Dapagliflozin       | 0,9576           | ns      |
| T1DM+Chitosan vs. T1DM+Dapagliflo | 0,9998           | ns      |
| Row 3                             |                  |         |
| Control vs. T1DM                  | 0,6495           | ns      |
| Control vs. T1DM+Chitosan         | 0,8661           | ns      |
| Control vs. T1DM+Dapagliflozin    | 0,5905           | ns      |
| T1DM vs. T1DM+Chitosan            | 0,9436           | ns      |
| T1DM vs. T1DM+Dapagliflozin       | 0,9896           | ns      |
| T1DM+Chitosan vs. T1DM+Dapagliflo | 0,9827           | ns      |
| Row 4                             |                  |         |
| Control vs. T1DM                  | 0,0057           | **      |
| Control vs. T1DM+Chitosan         | 0,0004           | ***     |
| Control vs. T1DM+Dapagliflozin    | 0,0448           | *       |
| T1DM vs. T1DM+Chitosan            | 0,995            | ns      |
| T1DM vs. T1DM+Dapagliflozin       | 0,1963           | ns      |
| T1DM+Chitosan vs. T1DM+Dapagliflo | 0,0208           | *       |
| Row 5                             |                  |         |
| Control vs. T1DM                  | 0,0244           | *       |
| Control vs. T1DM+Chitosan         | 0,0008           | ***     |
| Control vs. T1DM+Dapagliflozin    | 0,1143           | ns      |
| T1DM vs. T1DM+Chitosan            | 0,9984           | ns      |
| T1DM vs. T1DM+Dapagliflozin       | 0,3453           | ns      |
| T1DM+Chitosan vs. T1DM+Dapagliflo | 0,0646           | ns      |

Table S16. ANOVA test results on E/A ratio.

|                                      |         |      |
|--------------------------------------|---------|------|
| Row 2                                |         |      |
| Control vs. T1DM                     | 0,9997  | ns   |
| Control vs. T1DM+Chitosan            | 0,999   | ns   |
| Control vs. T1DM+Dapagliflozin       | 0,9854  | ns   |
| T1DM vs. T1DM+Chitosan               | 0,9951  | ns   |
| T1DM vs. T1DM+Dapagliflozin          | 0,992   | ns   |
| T1DM+Chitosan vs. T1DM+Dapagliflozin | 0,9679  | ns   |
| Row 3                                |         |      |
| Control vs. T1DM                     | 0,1879  | ns   |
| Control vs. T1DM+Chitosan            | 0,3903  | ns   |
| Control vs. T1DM+Dapagliflozin       | 0,1092  | ns   |
| T1DM vs. T1DM+Chitosan               | 0,9318  | ns   |
| T1DM vs. T1DM+Dapagliflozin          | 0,9522  | ns   |
| T1DM+Chitosan vs. T1DM+Dapagliflozin | 0,7173  | ns   |
| Row 4                                |         |      |
| Control vs. T1DM                     | 0,0041  | **   |
| Control vs. T1DM+Chitosan            | 0,0054  | **   |
| Control vs. T1DM+Dapagliflozin       | 0,019   | *    |
| T1DM vs. T1DM+Chitosan               | 0,991   | ns   |
| T1DM vs. T1DM+Dapagliflozin          | 0,176   | ns   |
| T1DM+Chitosan vs. T1DM+Dapagliflozin | 0,1382  | ns   |
| Row 5                                |         |      |
| Control vs. T1DM                     | <0,0001 | **** |
| Control vs. T1DM+Chitosan            | 0,0001  | ***  |
| Control vs. T1DM+Dapagliflozin       | 0,0018  | **   |
| T1DM vs. T1DM+Chitosan               | 0,0015  | **   |
| T1DM vs. T1DM+Dapagliflozin          | <0,0001 | **** |
| T1DM+Chitosan vs. T1DM+Dapagliflozin | 0,0048  | **   |

Table S17. ANOVA test results on stroke volume (SV).

| Tukey's multiple comparisons test    | Adjusted P Value | Summary |
|--------------------------------------|------------------|---------|
| Row 2                                |                  |         |
| Control vs. T1DM                     | 0,9983           | ns      |
| Control vs. T1DM+Chitosan            | 0,7945           | ns      |
| Control vs. T1DM+Dapagliflozin       | 0,6307           | ns      |
| T1DM vs. T1DM+Chitosan               | 0,814            | ns      |
| T1DM vs. T1DM+Dapagliflozin          | 0,6191           | ns      |
| T1DM+Chitosan vs. T1DM+Dapagliflozin | 0,9972           | ns      |
| Row 3                                |                  |         |
| Control vs. T1DM                     | 0,5049           | ns      |
| Control vs. T1DM+Chitosan            | 0,7838           | ns      |
| Control vs. T1DM+Dapagliflozin       | 0,1602           | ns      |
| T1DM vs. T1DM+Chitosan               | 0,9815           | ns      |
| T1DM vs. T1DM+Dapagliflozin          | 0,9649           | ns      |
| T1DM+Chitosan vs. T1DM+Dapagliflozin | 0,8231           | ns      |
| Row 4                                |                  |         |
| Control vs. T1DM                     | 0,0625           | ns      |
| Control vs. T1DM+Chitosan            | 0,2886           | ns      |
| Control vs. T1DM+Dapagliflozin       | 0,132            | ns      |
| T1DM vs. T1DM+Chitosan               | 0,9472           | ns      |
| T1DM vs. T1DM+Dapagliflozin          | 0,9443           | ns      |
| T1DM+Chitosan vs. T1DM+Dapagliflozin | 0,9998           | ns      |
| Row 5                                |                  |         |
| Control vs. T1DM                     | <0,0001          | ****    |
| Control vs. T1DM+Chitosan            | 0,0055           | **      |
| Control vs. T1DM+Dapagliflozin       | 0,0049           | **      |
| T1DM vs. T1DM+Chitosan               | 0,6172           | ns      |
| T1DM vs. T1DM+Dapagliflozin          | 0,4037           | ns      |
| T1DM+Chitosan vs. T1DM+Dapagliflozin | 0,9936           | ns      |

Table S 18. ANOVA test results on area of fibrosis.

| <b>Tukey's multiple comparisons test</b>    | <b>Adjusted P Value</b> | <b>Summary</b> |
|---------------------------------------------|-------------------------|----------------|
| <b>Control vs. T1DM</b>                     | <b>&lt;0,0001</b>       | <b>****</b>    |
| <b>Control vs. T1DM+Chitosan</b>            | <b>0,0017</b>           | <b>**</b>      |
| <b>Control vs. T1DM+Dapagliflozin</b>       | <b>0,0472</b>           | <b>*</b>       |
| <b>T1DM vs. T1DM+Chitosan</b>               | <b>0,013</b>            | <b>*</b>       |
| <b>T1DM vs. T1DM+Dapagliflozin</b>          | <b>0,0004</b>           | <b>***</b>     |
| <b>T1DM+Chitosan vs. T1DM+Dapagliflozin</b> | <b>0,538</b>            | <b>ns</b>      |

Table S 19. ANOVA test results on IOD of fibrosis.

| Tukey's multiple comparisons test    | Adjusted P Value | Summary |
|--------------------------------------|------------------|---------|
| Control vs. T1DM                     | <0,0001          | ****    |
| Control vs. T1DM+Chitosan            | 0,0009           | ***     |
| Control vs. T1DM+Dapagliflozin       | 0,0135           | *       |
| T1DM vs. T1DM+Chitosan               | 0,0002           | ***     |
| T1DM vs. T1DM+Dapagliflozin          | <0,0001          | ****    |
| T1DM+Chitosan vs. T1DM+Dapagliflozin | 0,7227           | ns      |



Table S20. ANOVA test results on 4-HNE immunoexpression.

| Tukey's multiple comparisons test    | Adjusted P Value | Summary |
|--------------------------------------|------------------|---------|
| CONTROL vs. T1DM                     | <0,0001          | ****    |
| CONTROL vs. T1DM +Chitosan           | 0,0086           | **      |
| CONTROL vs. T1DM +Dapagliflozin      | 0,0449           | *       |
| T1DM vs. T1DM +Chitosan              | 0,0086           | **      |
| T1DM vs. T1DM +Dapagliflozin         | 0,0014           | **      |
| T1DM +Chitosan vs. T1DM +Dapaglifloz | 0,8982           | ns      |
